# Supplementary material for: Goose Hepatic IGFBP2 Is Regulated by Nutritional Status and Participates in Energy Metabolism Mainly through the Cytokine−Cytokine Receptor Pathway
Source: MDPI journal article supplement (doi:10.3390/ani13142336), 2023-07-17
Supplement: s1 [file s1]

**Supplementary Figure S1**  
**(A)**

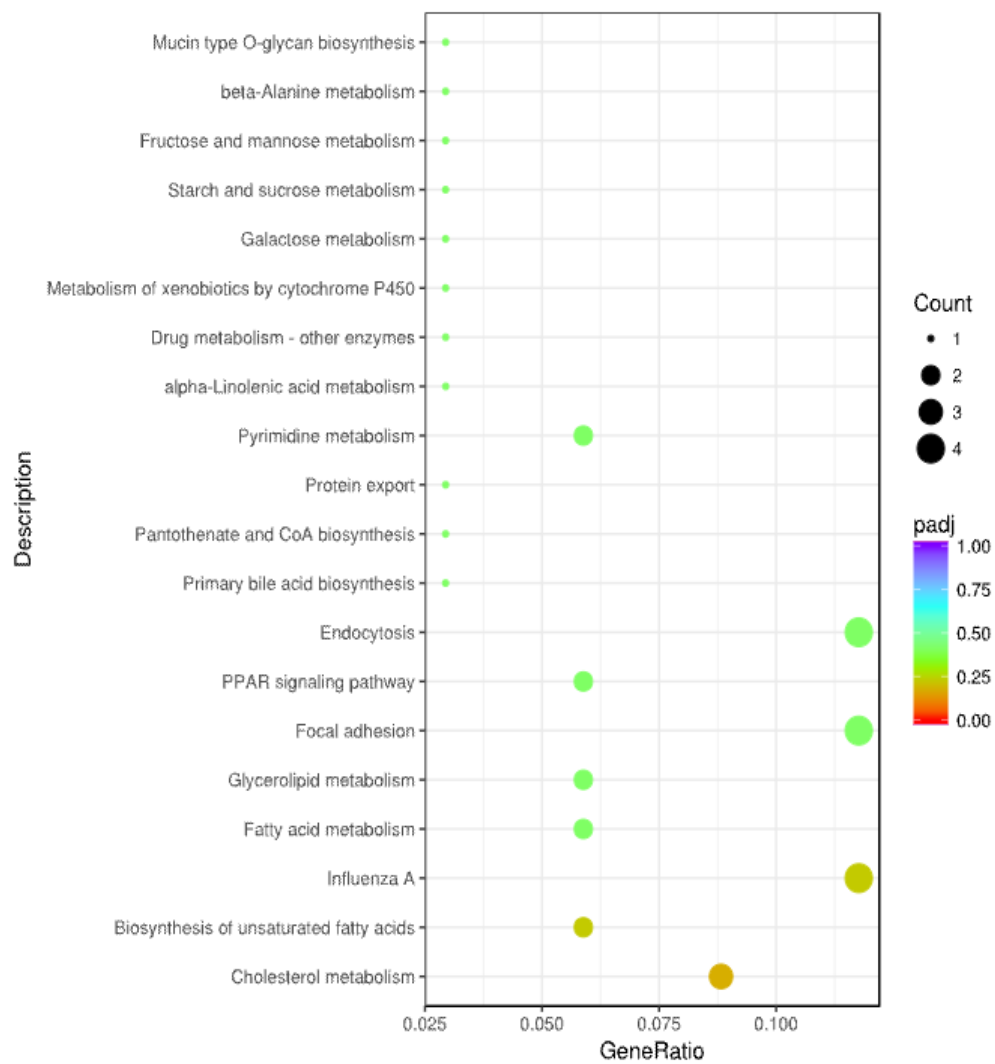

(B)

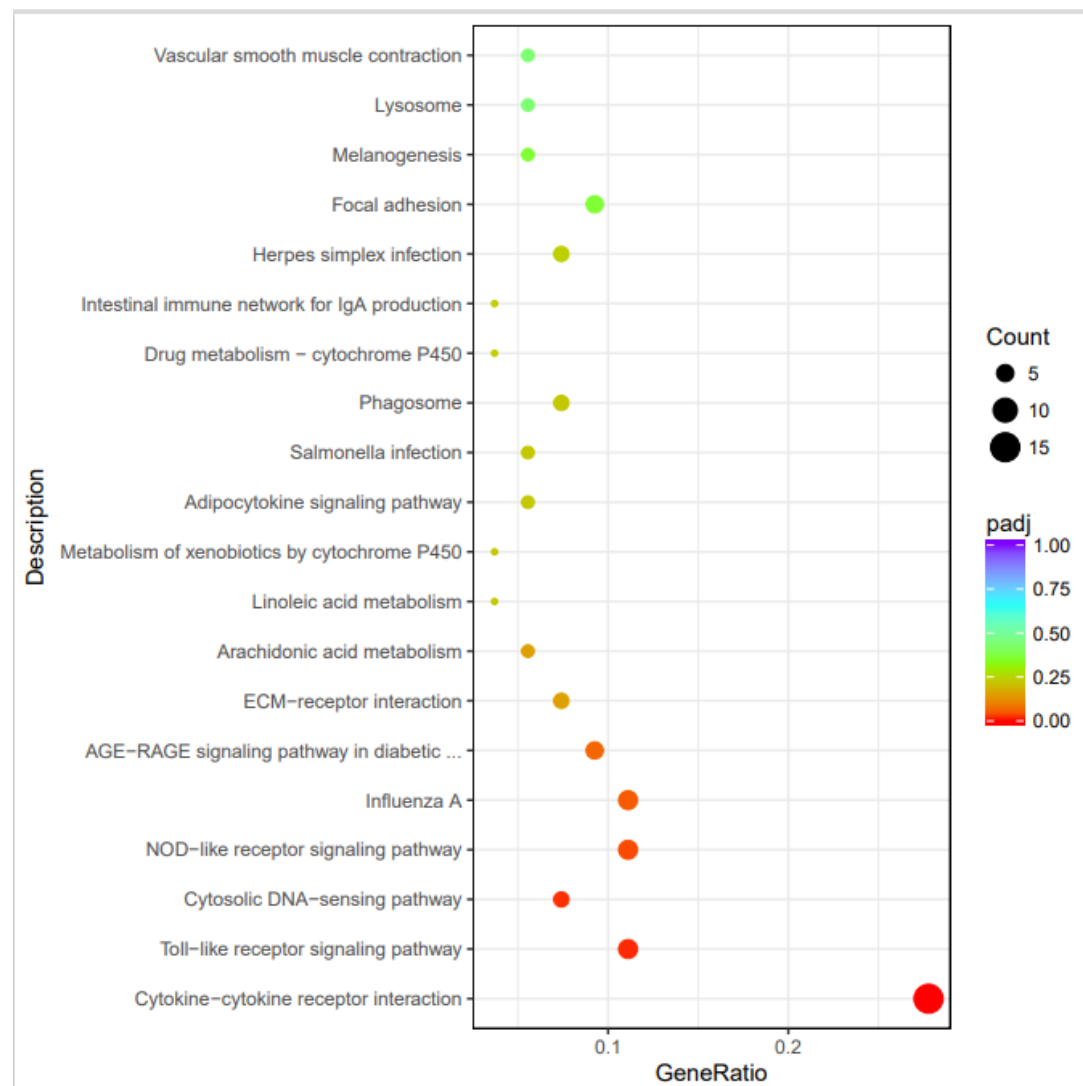

**Supplementary Figure S1.** The dot chart showing the results from KEGG enrichment analysis. Note: (A) The results of KEGG enrichment analysis with the upregulated DEGs. (B) The results of KEGG enrichment analysis with the downregulated DEGs. The abscissa indicates the ratio of the number of the annotated DEGs in a specified KEGG pathway to the total number of annotated DEGs, and the ordinate indicates the KEGG pathways. The colors denote the adjusted *p* value (padj), and the sizes of the dots denote the number of DEGs. The DEGs were identified in goose primary hepatocytes transfected with IGFBP2 overexpression vectors vs. empty vectors (n = 4).

**Supplementary Table S1. The sequences of the primers for qPCR analysis**

| Gene                | Sequence (5'→3')                                       | Product Size (bp) | Accession number |
|---------------------|--------------------------------------------------------|-------------------|------------------|
| <i>IGFBP2</i>       | F: GGGAGAAGGTGAATGAGCAG<br>R: GAGGGAGTAGAGGTGCTCCA     | 194               | XM_013196707.2   |
| <i>MAPCK7CL</i>     | F: CAGCCTCTGCCTCCTTGTC<br>R: GCTTCAGCGTTCGGTTCTC       | 226               | XM_048071423.1   |
| <i>SLC40A1</i>      | F: CTGGGGAGATCGTATGTGGC<br>R: AGGATGTCTGGGCCACTTTG     | 179               | XM_048058484.1   |
| <i>STAT4</i>        | F: GCACGCCTTTTGTTCGGTAT<br>R: TCCATTGGGACATACTCAGCAC   | 200               | XM_048058203.1   |
| <i>LOC106041089</i> | F: CCCAGCCAGGCGTGATATTC<br>R: TGATGCTTGAAGGGAGCAGG     | 143               | XM_013189339.2   |
| <i>IL6</i>          | F: CGACGATAAGGCAGATGGTGATA<br>R: ACAGCCCTCACGGTTTTCTC  | 172               | XM_048070285.1   |
| <i>LOC106037025</i> | F: CAGAAGACAGGAGGTGAGCC<br>R: GTCATCCTGTGCCTCCTATGG    | 115               | XM_013182731.2   |
| <i>LOC106041041</i> | F: CAGCTTCGTGACCGACTACT<br>R: CCTTCCTTGTGATGAACACGAC   | 154               | XM_013189266.2   |
| <i>IL22RA1</i>      | F: TCAACCAACGGACACACCAA<br>R: AAGCCATGTGGTGTCTGCTA     | 173               | XM_013184113.2   |
| <i>LOC106041919</i> | F: CAGAGAAGTGTGCCTGGACC<br>R: GCTTGGTGTTCCTTGCTCC      | 80                | XM_013190619.2   |
| <i>LOC106038554</i> | F: ACGAGCAATGTGACCGTCTT<br>R: ACCCAGTGTTTTACCCAGCC     | 238               | XM_048070544.1   |
| <i>LOC106041040</i> | F: GCTGACACAACCATCTGCTG<br>R: ACCTCCTGGTGATGAACACAAC   | 123               | XM_013189265.2   |
| <i>LOC101042256</i> | F: TGCAAAGTGCAGGAAGATAATGA<br>R: GGCAAGGGAAATGAATCCAGC | 210               | XM_013191039.2   |
| <i>CCL20</i>        | F: AGTACCTCCCAAGCACAAAGC<br>R: CGCAGACTTCACTGGAGAGC    | 112               | XM_013181430.2   |
| <i>RSAD2</i>        | F: GCGTCAACTACCACTTCACC<br>R: AATTTTCTCCATTCCCGCCTCC   | 140               | XM_013172803.2   |
| <i>FGB</i>          | F: ACCCAAACAGACTACTGCCG<br>R: TGAATCAAAGTCCAGCCTCCA    | 197               | XM_013175323.2   |
| <i>CD9</i>          | F: TTAAAGGAGTGGCGCTGTGG<br>R: TTAGTGCCTCCTTTGACGGG     | 108               | XM_013196002.2   |
| <i>COTL1</i>        | F: GAGGTGTCACGGCACAGTAA<br>R: CTCCTGAGCCCCAGCATTAG     | 117               | XM_013195033.2   |
| <i>B-ACTIN</i>      | F: CAACGAGCGGTTCAAGGTGT<br>R: TGGAGTTGAAGGTGGTCTCG     | 132               | XM_013174886.1   |
| <i>GAPDH</i>        | F: GCCATCAATGATCCCTTCAT<br>R: CTGGGGTCACGCTCCTG        | 155               | XM_013199522.2   |

**Supplementary Table S2. The data volume and mapping rate for RNAseq**

| Sample ID | Data volume (base pair) | Mapping rate (%) |
|-----------|-------------------------|------------------|
| C1        | 7.7G                    | 72.9             |
| C2        | 7.0G                    | 69.7             |
| C3        | 7.9G                    | 71.5             |
| C4        | 6.3G                    | 72.4             |
| T1        | 7.0G                    | 66.7             |
| T2        | 6.7G                    | 73.0             |
| T3        | 7.2G                    | 73.1             |
| T4        | 7.0G                    | 73.6             |

**Supplementary Table S3. Top 10 up- and down-regulated differentially expressed genes (sorted by fold change)**

| Gene name                                                 | Gene symbol         | Log <sub>2</sub> (Fold Change) | p-Value                | adjusted p-value       |
|-----------------------------------------------------------|---------------------|--------------------------------|------------------------|------------------------|
| Upregulated                                               |                     |                                |                        |                        |
| Solute Carrier Family 34 Member 2                         | <i>SLC34A2</i>      | 1.84                           | $4.08 \times 10^{-7}$  | $4.99 \times 10^{-5}$  |
| Diras Family Gtpase 2                                     | <i>DIRAS2</i>       | 1.71                           | $5.05 \times 10^{-4}$  | $2.10 \times 10^{-2}$  |
| Adhesion G Protein-coupled Receptor D1                    | <i>ADGRD1</i>       | 1.39                           | $1.91 \times 10^{-4}$  | $5.96 \times 10^{-3}$  |
| Gooseoid Homeobox                                         | <i>GSC</i>          | 1.37                           | $1.04 \times 10^{-4}$  | $1.80 \times 10^{-3}$  |
| Collectin Subfamily Member 10                             | <i>COLEC10</i>      | 1.34                           | $2.64 \times 10^{-5}$  | $1.50 \times 10^{-}$   |
| Uncharacterized LOC106032316                              | <i>LOC106032316</i> | 1.32                           | $7.46 \times 10^{-10}$ | $9.30 \times 10^{-3}$  |
| MAP3K7 C-terminal Like                                    | <i>MAP3K7CL</i>     | 1.30                           | $1.84 \times 10^{-4}$  | $1.11 \times 10^{-4}$  |
| Matrix Gla Protein                                        | <i>MGP</i>          | 1.29                           | $1.03 \times 10^{-6}$  | $2.91 \times 10^{-6}$  |
| Riboflavin-Binding Protein                                | <i>LOC106033105</i> | 1.17                           | $1.86 \times 10^{-8}$  | $2.35 \times 10^{-3}$  |
| Keratin, Type I Cytoskeletal 19                           | <i>LOC106048013</i> | 1.17                           | $3.42 \times 10^{-5}$  | $1.36 \times 10^{-4}$  |
| Downregulated                                             |                     |                                |                        |                        |
| Interleukin 17A                                           | <i>IL17A</i>        | -2.77                          | $6.05 \times 10^{-12}$ | $1.84 \times 10^{-9}$  |
| Src Family Transcript Variant X1                          | <i>BLK</i>          | -2.15                          | $6.77 \times 10^{-6}$  | $5.74 \times 10^{-4}$  |
| Toll-Like Receptor 2                                      | <i>LOC106042256</i> | -2.07                          | $4.86 \times 10^{-28}$ | $7.81 \times 10^{-25}$ |
| Ovostatin-Like                                            | <i>LOC106048083</i> | -1.99                          | $3.38 \times 10^{-10}$ | $7.06 \times 10^{-8}$  |
| Cysteine-Rich Secretory Protein LCCL Domain Containing 2  | <i>CRISPLD2</i>     | -1.89                          | $5.19 \times 10^{-5}$  | $3.40 \times 10^{-3}$  |
| Serpin B4-Like                                            | <i>LOC106048987</i> | -1.77                          | $1.30 \times 10^{-4}$  | $7.13 \times 10^{-3}$  |
| ADAM Metallopeptidase With Thrombospondin Type 1 Motif 15 | <i>ADAMTS15</i>     | -1.76                          | $1.29 \times 10^{-4}$  | $7.12 \times 10^{-3}$  |
| Family With Sequence Similarity 167 Member A              | <i>FAM167A</i>      | -1.73                          | $2.39 \times 10^{-11}$ | $6.41 \times 10^{-9}$  |
| C-C Motif Chemokine Ligand 20                             | <i>CCL20</i>        | -1.68                          | $2.46 \times 10^{-8}$  | $3.74 \times 10^{-6}$  |
| Retinoic Acid-Induced Protein 3-Like                      | <i>LOC106045506</i> | -1.65                          | $1.50 \times 10^{-48}$ | $1.30 \times 10^{-2}$  |

**Note:** The differentially expressed genes (DEGs) were identified from transcriptome analysis of goose primary hepatocytes transfected with IGFBP2 overexpression vector and empty vector (the control). The genes shown in this table are the top 10 upregulated or downregulated DEGs with the largest  $|\log_2(\text{fold change})|$  values. The fold change refers to the ratio of expression level of the DEG in the IGFBP2-overexpressing cells to that of the control cells. The letter 'E' indicates the scientific notation.

**Supplementary Table S4. The KEGG pathways significantly enriched with the differentially expressed genes (DEGs)**

| <b>KEGG pathways</b>                                        | <b>The differentially expressed genes</b>                                                                                                                  |
|-------------------------------------------------------------|------------------------------------------------------------------------------------------------------------------------------------------------------------|
| <b>Cytokine-cytokine receptor interaction</b>               | LOC106041040/IL6/IL2RA/IL22RA1/LOC106038123/<br>LOC106041041/IL17A/SSF49265/CCL20/LIF/<br>LOC106038554/LOC106041919/IL22RA2/FIGF/TNFRSF1B/<br>LOC106048600 |
| <b>Cytosolic DNA-sensing pathway</b>                        | LOC106041040/IL6/LOC106041041/NFKBIA                                                                                                                       |
| <b>Toll-like receptor signaling pathway</b>                 | LOC106041040/IL6/LOC106041041/NFKBIA/<br>LOC106041919/PIK3R3                                                                                               |
| <b>AGE-RAGE signaling pathway in diabetic complications</b> | IL6/LOC106041602/LOC106041919/FIGF/PIK3R3/PLCB2                                                                                                            |
| <b>Arachidonic acid metabolism</b>                          | PTGS2/HPGDS/LOC106033102/PTGES                                                                                                                             |
| <b>Metabolism of xenobiotics by cytochrome P450</b>         | HPGDS/MGST2/ALDH1A3                                                                                                                                        |
| <b>Focal adhesion</b>                                       | VVF/LOC106038554/CAV2/LAMB3/FIGF/ITGB5/CAV1/<br>PIK3R3/ITGB4                                                                                               |
| <b>NOD-like receptor signaling pathway</b>                  | LOC106041040/IL6/NFKBIA/LOC106041919/ANTXR2/<br>PLCB2                                                                                                      |
